# Supplementary material
Source: PubMed Central journal article supplement (PMC3965299)
Supplement: NIHMS545395-supplement-251_2013_749_MOESM1_ESM.pdf [file NIHMS545395-supplement-251_2013_749_MOESM1_ESM.pdf]

**- Electronic Supplementary File -**

**Multiple Divergent Haplotypes Express Completely Distinct Sets of Class I MHC Genes in Zebrafish**

*Immunogenetics*

Sean C. McConnell, Anthony C. Restaino and Jill L.O. de Jong\*

Department of Pediatrics, Section of Hematology/Oncology

University of Chicago, Knapp Center for Biomedical Discovery

900 E. 57<sup>th</sup> St, Chicago, IL 60637

\*Corresponding Author: Jill de Jong, M.D., Ph.D.

e-mail: [jdejong@peds.bsd.uchicago.edu](mailto:jdejong@peds.bsd.uchicago.edu)

Tel: 1-773-702-8547

Fax: 1-773-834-1329

|                   |                           |
|-------------------|---------------------------|
| <i>uba</i> e2 FOR | TTCTACTGGGCTATCCTGAAGTATT |
| <i>uba</i> e3 REV | TCATCCATCTCACAGCCGTA      |
| <i>uca</i> e2 FOR | AGCGCCATACTGCAAAATTCA     |
| <i>uca</i> e3 REV | TCATCCCCTCACAACCGTAAA     |
| <i>uda</i> e2 FOR | TGGCAATTGGCTATCATCAG      |
| <i>uda</i> e3 REV | AGACAAAATCCTCCCCATCA      |
| <i>uea</i> e2 FOR | TGCCAAAGACAGAGTGGATG      |
| <i>uea</i> e3 REV | AGCCGTACATTTGCTGGAAT      |
| <i>ufa</i> e2 FOR | GGTCAGAGGGGCTGTAGATG      |
| <i>ufa</i> e3 REV | CCGACCATGAACTGGAAAGT      |
| <i>uga</i> e2 FOR | CCACACATCAAGCCTTCAAA      |
| <i>uga</i> e3 REV | CCCTCGAGTACTGCCATCAT      |
| <i>uha</i> e2 FOR | AGGGCCATACTGCATCATTC      |
| <i>uha</i> e3 REV | AGCCGTACATTCGTTGATTTG     |
| <i>uia</i> e2 FOR | TGGCATTGTTCCAGTCTTCA      |
| <i>uia</i> e3 REV | TTCCAGAGTCAGCCAGTCCT      |
| <i>uja</i> e2 FOR | AATGGACAAATTGCCTCTGG      |
| <i>uja</i> e3 REV | TACATTGCCTGAACTGTGTGAA    |
| <i>uka</i> e2 FOR | ACTGCAACGTTCAAGAACAACA    |
| <i>uka</i> e3 REV | ACTCACAGCCGTACATTTCTT     |
| <i>β2m</i> e1 FOR | GGAAAGTCTCCACTCCGAAA      |
| <i>β2m</i> e2 REV | GGATGGAAGCTGCTCACATAG     |

**Table S1** qPCR primers specific for zebrafish Class I genes

Primers were designed flanking intron 2, typically the largest intron for teleost Class I genes, within exon 2 (e2) and exon 3 (e3). For  $\beta_2$ -microglobulin, primers were designed in exon 1 (e1) and exon 2 (e2).

|                     |                              |
|---------------------|------------------------------|
| <i>uba</i> TOPO FOR | caccATGCAGTCGCTAATAGGTCTGC   |
| <i>uba</i> TOPO REV | TTATGTACGAGATGAGTTGTCTGATC   |
| <i>uca</i> TOPO FOR | caccATGGAGTACATACTGCTGCTGGT  |
| <i>uca</i> TOPO REV | TCAGTTTTCTTTGTCATATTTTTGTC   |
| <i>uda</i> TOPO FOR | caccATGCAGCAGATTGTGCTTTTG    |
| <i>uda</i> TOPO REV | TTATGCCTGTGGAAGTGCAT         |
| <i>uea</i> TOPO FOR | caccATGCAGCAGGTTTTGCTTATG    |
| <i>uea</i> TOPO REV | TTATGCTTGTGGAAGTGCATGA       |
| <i>ufa</i> TOPO FOR | caccATGCGGCAGCTTGTGCTT       |
| <i>ufa</i> TOPO REV | TCACCTGAACAGTTGGTGGA         |
| <i>uga</i> TOPO FOR | caccATGCAGCAGGTTTTGCTTTTTTC  |
| <i>uga</i> TOPO REV | CTACTTCACCTCAACAGCTCGTG      |
| <i>uha</i> TOPO FOR | caccATGCAGTCGCTAACAGGTCTG    |
| <i>uha</i> TOPO REV | TCATGCTCGTGGACCATCTT         |
| <i>uia</i> TOPO FOR | caccATGCAGACGATTATTCTTTTTGC  |
| <i>uia</i> TOPO REV | TTATGCTTGTGGAAGTGCATGA       |
| <i>uja</i> TOPO FOR | caccATGAGGGCTATTCTGATCTTTCTC |
| <i>uja</i> TOPO REV | TTATGCTTGTGGCACTGCAT         |
| <i>uka</i> TOPO FOR | caccATGGAGTACATACTGCTGCTGGT  |
| <i>uka</i> TOPO REV | TTAGCTTTTGTGTGAAACACTGTC     |

**Table S2** TOPO primers specific for zebrafish Class I genes

Forward primers begin with the sequence ATG from the presumed start codon. The sequence CACC was added to the 5' end of the forward primer to facilitate directional cloning. For the reverse primer, sequences begin with the presumed stop codon.

|                   |                          |
|-------------------|--------------------------|
| <i>uba</i> 5' FOR | gaagtagttcttctgaatctcgta |
| <i>uba</i> 5' REV | atcatcatccatctcacage     |
| <i>uda</i> 5' FOR | gaggtgttcggatcacttat     |
| <i>uda</i> 5' REV | ggattgtgtgaataccctgt     |
| <i>uea</i> 5' FOR | cgcataattaagtaatttctccag |
| <i>uea</i> 5' REV | agtcctctccatcataacca     |
| <i>ufa</i> 5' FOR | gaggggttcggttctttc       |
| <i>ufa</i> 5' REV | tgatgaagtcctctccatca     |
| <i>uga</i> 5' FOR | tcgggtctctatTTTTatgtca   |
| <i>uga</i> 5' REV | tcacctgaaatgtgtgaaca     |
| <i>uha</i> 5' FOR | tggggatttgagaaggaaag     |
| <i>uha</i> 5' REV | cgttgttcttgaatgatgca     |
| <i>uia</i> 5' FOR | gtcaagggccgattetaac      |
| <i>uia</i> 5' REV | tttgaagactggaacaatgc     |
| <i>uja</i> 5' FOR | cccggacctcagattataga     |
| <i>uja</i> 5' REV | cattcctgttccagaagtca     |
| <i>uka</i> 5' FOR | tcttcgggatttgtgaatga     |
| <i>uka</i> 5' REV | gcacaccttggtttgattt      |

**Table S3** 5' sequencing primers specific for zebrafish Class I genes

Primers were designed flanking the presumed start codon.

|                   |                       |
|-------------------|-----------------------|
| <i>uba</i> 3' FOR | ggagcatcagagcaaaacta  |
| <i>uba</i> 3' REV | ttgcatgtttctcaaaact   |
| <i>uda</i> 3' FOR | acgaagttctgttccttt    |
| <i>uda</i> 3' REV | aggttctgtgatcaatgtgt  |
| <i>uea</i> 3' FOR | cttgattgtcggagtgttg   |
| <i>uea</i> 3' REV | cagccctccaattagtgat   |
| <i>ufa</i> 3' FOR | aagaagcctacagatgtgtg  |
| <i>ufa</i> 3' REV | tgccaatgatgatttcaaca  |
| <i>uga</i> 3' FOR | gcaattattgttgctgtgt   |
| <i>uga</i> 3' REV | ttgtccccctgaaatcaaa   |
| <i>uha</i> 3' FOR | ggcaattgaggattctgttt  |
| <i>uha</i> 3' REV | gcaaaaagaggaagagagagt |
| <i>uia</i> 3' FOR | cttgattgctggagtgttg   |
| <i>uia</i> 3' REV | atgtgcatacataggcat    |
| <i>uja</i> 3' FOR | cttgattgctggagtgttg   |
| <i>uja</i> 3' REV | acagacataattcgetcaca  |
| <i>uka</i> 3' FOR | ctccattggcatcatcatt   |
| <i>uka</i> 3' REV | catgcaagtgtcagaacatt  |

**Table S4** 3' sequencing primers specific for zebrafish Class I genes

Primers were designed flanking the presumed stop codon.

**Table S5** Primers for generating probe against zebrafish Class I U lineage genes

Primers for generating the genomic Southern probe were designed in the relatively conserved  $\alpha 3$  domain of the *uda* gene.

|                                 |                      |
|---------------------------------|----------------------|
| <i>uda</i> $\alpha 3$ probe FOR | tctcctcaggtgtctctgct |
| <i>uda</i> $\alpha 3$ probe REV | tgatgctccaccacacatct |
